# Pharmacokinetics of anti-tuberculosis drugs in multidrug resistant tuberculosis patients in India

Hemanth Kumar AK<sup>a\*</sup>, Natarajan PL<sup>a</sup>, Kannan T<sup>a</sup>, Sridhar R<sup>b</sup>, Kumar S<sup>b</sup>, Vinod Kumar V<sup>b</sup>, Gomathi NS<sup>a</sup>, Bharathiraja T<sup>a</sup>, Sudha V<sup>a</sup>, Balaji S<sup>a</sup>, Rameshkumar S<sup>a</sup>, Dina Nair<sup>a</sup>, Tripathy SP<sup>a</sup>, Geetha R<sup>a</sup>

<sup>a</sup> National Institute for Research in Tuberculosis, Chennai

<sup>b</sup> Government hospital of Thoracic Medicine, Chennai

Running head: PK of anti-TB drugs in MDR TB

## \*Correspondence:

Dr. A K Hemanth Kumar

Scientist 'D' & Head

Department of Clinical Pharmacology

National Institute for Research in Tuberculosis

Mayor Sathyamoorthy Road

Chetpet, Chennai – 600 031

India

Ph.no: 91-44-28369650

Email: hemanthkumarak@nirt.res.in

Fax: 91-44-28362528

NOTE: This preprint reports new research that has not been certified by peer review and should not be used to guide clinical practice.

## Abstract

Programmatic Management of multidrug resistant tuberculosis (MDR TB) services were introduced in the Indian TB control programme in 2007. A pharmacokinetic (PK) study of drugs used to treat MDR TB, namely levofloxacin (LFX), ethionamide (ETH), cycloserine (CS), pyrazinamide (PZA), moxifloxacin (MFX) and isoniazid (INH) was undertaken in adult MDR TB patients treated according to the prevailing guidelines in India. Factors influencing drug PK and end-of-intensive phase (IP) status were also determined. We recruited 350 MDR TB patients receiving anti-TB treatment (ATT) in the Indian Government programme in south India. At steady state, serial blood samples were collected, after supervised drug administration. Status at end of IP was noted from the programme records. Of the 303 patients for whom end-of-IP status was known, 214 were culture negative (responders), while 45 patients were either culture positive or required change of regimen or had died before completion of IP (non-responders). The median  $C_{max}$  (2.0 vs 2.9 $\mu$ g/ml;  $p = 0.005$ ) and  $AUC_{0-12}$  (12.2 vs 17.0 $\mu$ g/ml.h;  $p = 0.002$ ) of ETH were significantly lower in non-responders than responders at IP. In multivariate logistic regression analysis, after excluding defaulters and adjusting for confounders,  $AUC_{0-12}$  of ETH significantly influenced end-of-IP status (aOR - 1.065; 95% CI: 1.001 - 1.134;  $p = 0.047$ ). Drug doses used currently in the programme produced optimal drug concentrations in majority of patients. ETH played a major role in the MDR TB combination regimen and was a key determinant of end-of-IP status.

**Keywords:** Multi-drug tuberculosis; Pharmacokinetics; anti-TB drugs; India

66 The burden of multidrug-resistant (MDR) tuberculosis (TB) is of major interest and concern at  
67 global, regional and country levels. In 2018, there were approximately half a million (range 417000  
68 – 556000) new cases of rifampicin-resistant (RR) TB, of which 78% had MDR TB (1). India  
69 accounts for 27% of the total MDR TB cases worldwide, which is the highest for any country. This  
70 is followed by China (14%) and the Russian federation (9%).

71 The National TB Elimination Programme (NTEP) in India had introduced Programmatic  
72 Management of MDR TB (PMDT) services in 2007, and a complete geographic coverage was  
73 achieved in 2013 (2). Under this programme, MDR TB patients were treated with six drugs which  
74 included an aminoglycoside and a fluoroquinolone for a total period of 24 months. The intensive  
75 phase (IP) of treatment was for 6 months comprising of kanamycin (Km), levofloxacin (LFX) ,  
76 ethionamide (ETH), cycloserine (CS), pyrazinamide (PZA) and ethambutol (EMB) daily, followed  
77 by the continuation phase of treatment for the remaining 18 months with LFX, Eth, CS and EMB  
78 daily. If the 4<sup>th</sup> month culture for *M. tuberculosis* was positive, the intensive phase was extended  
79 up to 9 months. Subsequently, in 2018, the regimens were revised and the duration of treatment  
80 was shorter for a period of 9 months. In the revised regimen, the initial IP was for 4 months, during  
81 which patients received Km, moxifloxacin (MFX), high dose isoniazid (INH), PZA, clofazimine  
82 (CFZ), Eth and EMB daily. This was followed by the continuation phase for the remaining 5  
83 months, during which patients received MFX, CFZ, PZA and EMB daily. In both regimens, drug  
84 doses were based on body weight and were available in four weight bands, namely, 16 - 29 kg, 30  
85 - 45 kg, 46 - 70 kg and > 70 kg (Table 1).

86 Cure rates observed among MDR TB patients from different studies varied from 31% to 75%, the  
87 treatment regimens being different in these studies. A study from south India on the management  
88 of MDR TB, reported a cure rate of 38%, with failure (25%), default (24%) and death (12%) (3).  
89 The reasons for development of MDR TB could be due to microbial, clinical or programmatic  
90 issues. Clinical characteristics of patients have also been recognized wherein appropriately  
91 administered drug doses may not achieve necessary drug levels to deal with all populations of  
92 mycobacteria. Maintaining therapeutic drug concentrations in blood is an important requisite to  
93 achieve satisfactory treatment outcome. The National Jewish Medical and Research Centre at  
94 Denver, CO, USA recommends measurement of serum concentrations of second-line anti-TB  
95 drugs early in the course of treatment, so that poor drug absorption can be dealt with, in a timely  
96 manner by optimizing drug doses (4).

97 A few studies have reported on the pharmacokinetics (PK) of second-line anti-TB drugs. A  
98 population PK study in 14 MDR TB patients from Korea has been reported (5). Another study from  
99 Tanzania has examined plasma activity of certain second-line anti-TB drugs in 25 patients with  
100 MDR TB (6). Park and others from the Republic of Korea have described the PK of second-line  
101 anti-TB medications in healthy volunteers (7). However, there is a paucity of PK data of second-

line anti-TB drugs in MDR TB patients from India. We undertook a prospective study to determine the PK of certain anti-TB drugs (LFX, MFX, Eth, CS, PZA, INH) in adult MDR TB patients in south India treated according to the prevailing NTEP guidelines. We also examined factors that influenced drug PK and culture status at end of IP.

## Methods

### Patients

A prospective study was undertaken in adult patients with MDR TB receiving anti-TB treatment (ATT) at the Government Hospital for Thoracic Medicine, Chennai, India during June 2016 to September 2019. All the patients were bacteriologically confirmed to have MDR TB based on drug susceptibility tests. Diagnosis and treatment were in accordance with the NTEP guidelines (2 - 3 of protocol). All the patients received drugs from the NTEP under direct supervision.

Patients meeting the following study criteria were recruited: (i) aged 18 years or above (ii) body weight > 30kg (iii) minimum seven doses of ATT drugs (iv) not very sick or moribund and (v) willing to participate and give informed written consent. A structured questionnaire was used to collect patient details. The study was approved by the Institutional Ethics Committee.

### Study procedures

The PK study was conducted at the Government Hospital of Thoracic Medicine, Chennai, India after patients have had at least two weeks of treatment. Eligible patients were requested to get admitted to the hospital ward at least a day prior to start of the study. On the day of the study, a sample of blood (2 ml) was collected (pre-dosing). The prescribed anti-TB drugs were administered to the patients under supervision. Thereafter, serial blood samples were collected at 1, 2, 4, 6, 8 and 12 hours after drug administration. Those with a known history of type 2 diabetes mellitus (DM), with or without random blood glucose  $\geq$  200mg/dl on the study day was considered diabetic. The patients' body mass index (BMI) was calculated from their height and body weight. A BMI below 18.5 was considered malnourished.

### Drug estimations

Plasma concentrations of LFX, MFX, ETH, CS, INH and PZA were estimated by High Performance Liquid Chromatography (HPLC) (Shimadzu Corporation, Kyoto, Japan) according to validated methods described elsewhere. In brief, the method to estimate LFX and MFX involved deproteinisation of the sample with perchloric acid and analysis of the supernatant using a reversed-phase C18 column (150mm) using fluorescence detector set at an excitation wavelength of 290 nm and an emission wavelength of 460 nm. The mobile phase consisted of a mixture of phosphate buffer and acetonitrile. The retention times of LFX and MFX were 1.8 and 4.6 minutes respectively (8, 9).

135 Plasma INH and PZA were estimated simultaneously by extraction using para-  
136 hydrobenzaldehyde and trifluoro acetic acid. Analysis was performed using a C<sub>8</sub> column at  
137 267nm. The mobile phase consisted of water: methanol containing perchloric acid and tetrabutyl  
138 n-ammonium hydroxide. The retention times of PZA and INH were 3 and 5.5 minutes respectively  
139 (10).

140 The method for estimation of CS involved extraction of the drug using solid phase extraction  
141 cartridges. The analytical column was Atlantis T3 and the mobile phase was a mixture of  
142 phosphate buffer, acetonitrile and isopropyl alcohol. The retention time of CS was 4.8 minutes  
143 (11).

144 The method for estimation of ETH involved deproteinisation of the sample with perchloric acid and  
145 analysis of the supernatant using a reversed-phase CN column (150mm) and UV detector set at  
146 267 nm. The mobile phase consisted of Milli-Q water and methanol containing 0.05% perchloric  
147 acid and 0.1% tetrabutyl N-ammonium hydroxide. The retention time of ETH was 4.9 minutes (12).

148 **Calculation of Pharmacokinetic variables:** Based on plasma concentration of drugs at different  
149 time-points, certain PK variables such as peak concentration ( $C_{max}$ ), time at which  $C_{max}$  was  
150 attained ( $T_{max}$ ), area under the concentration-time curve ( $AUC_{0-12}$ ) and half-life ( $t_{1/2}$ ) were  
151 calculated based on non-compartmental analysis using STATA 15.0 (StataCorp, College Station,  
152 Texas, USA).

### 153 **Follow-up during treatment**

154 All patients continued to receive ATT according to NTEP guidelines. Culture results at end of  
155 intensive phase, wherever available were recorded from the treatment card of patients. Based on  
156 the culture status at end of IP, patients were divided into two groups - (i) those who were culture  
157 negative (responders) and (ii) those who remained culture positive, those who had died during IP,  
158 and those who required change in regimen (non-responders).

159 **Statistical Evaluation:** Data were analysed using STATA 15.0 (StataCorp, College Station,  
160 Texas, USA). Shapiro-Wilks test was used to assess normality of the PK data. Values were  
161 expressed as median and range. Non-parametric Mann-Whitney U test was used to compare  
162 subgroups. Proportion of patients having  $C_{max}$  within the therapeutic ranges (8 - 13 $\mu$ g/ml for LFX;  
163 20 - 60 $\mu$ g/ml for PZA; 2 - 5 $\mu$ g/ml for ETH; 20 - 35 $\mu$ g/ml for CS; 3 - 6 $\mu$ g/ml for INH 300/600mg; 9 -  
164 15 $\mu$ g/ml for INH 900mg) (13) were calculated. Drug  $C_{max}$  and  $AUC_{0-12}$  were compared between  
165 responders and non-responders to ATT. Multiple linear regression analysis by stepwise method  
166 was carried out to identify factors that influenced  $C_{max}$  and  $AUC_{0-8}$  of drugs. Logistic regression  
167 model was used to identify the association of  $C_{max}$  and  $AUC_{0-12}$  with culture negativity at the end of  
168 IP. Some of the following factors such as age, gender, body weight, smoking status, alcoholism,  
169 DM, culture and drug doses were considered in the regression model after considering the  
170 variance inflation factor (VIF) and co-linearity. A  $p \leq 0.05$  was considered statistically significant.

171

172

## 173 **Sample Size**

174 The sample size was calculated based on the study of Mpagama et al (6), who reported the peak  
175 concentration of ETH to be 3.6µg/ml with the standard deviation of 1.8. Assuming a marginal error  
176 of 20% and 10% refusal for blood draw, the sample size required was 346 patients.

## 177 **Results**

178 There were two groups of patients; those who were initially recruited received the LFX containing  
179 regimen (Regimen 1) and subsequently when the programme revised the regimen, the patients  
180 were being treated with the MFX-containing regimen (Regimen 2). A total of 350 patients took part  
181 in the study, among whom 274 and 76 patients respectively received regimens 1 and 2. We  
182 analysed combined data from both regimens and also performed regimen-wise analysis. We  
183 present results obtained from the combined data. Details of all the patients recruited to the study  
184 are shown in Table 2. Overall, patients with DM constituted 42% of the study population. About  
185 62.3% of the patients had BMI <18.5kg/sq.m. A high proportion of patients were males (82.3%),  
186 had pulmonary TB (97.1%) and were previously treatment with Category II ATT regimen (70.3%).

187 The PK parameters of LFX, ETH, CS, PZA, MFX, and INH are shown in Table 3. PK data was  
188 available for 252, 259, 235, 300, 69, 63 patients for LFX, ETH, CS, PZA, MFX and INH  
189 respectively. Missing values were mainly because patient had not taken a particular drug on the  
190 study day or blood sample was not sufficient to undertake drug estimation. The median  $T_{max}$  was 2  
191 hours for all the drugs tested in this study. The number of patients with  $C_{max}$  of LFX within the  
192 therapeutic range (8 - 13µg/ml) was 126 (50%). The corresponding numbers for ETH (2 - 5µg/ml),  
193 CS (20 - 35µg/ml), PZA (20 - 60µg/ml), MFX (3 - 5µg/ml), INH 300mg/600mg (3 - 6µg/ml), INH  
194 900mg (9 - 15µg/ml) were 171 (66%), 83 (35.3%), 211 (70.3%), 22 (31.9%), 3 (7.5%) and 11  
195 (47.8%) respectively. A high proportion of patients had  $C_{max}$  of CS (57.9%), MFX (58%) and INH  
196 300mg/600mg (85%) above the upper limit of the therapeutic range. Those with sub-therapeutic  
197  $C_{max}$  ranged from 3.3% for PZA to 27.4% for ETH.

198 Drug  $C_{max}$  and  $AUC_{0-12}$  of the different groups of patients are shown in Tables 4 and 5 respectively.  
199 Patients above 45 years of age had significantly higher  $C_{max}$  and  $AUC_{0-12}$  of LFX than those below  
200 45 years ( $C_{max}$ : 12.0 vs 11.2µg/ml,  $p = 0.041$ ;  $AUC_{0-12}$ : 94.7 vs 82.0µg/ml.h,  $p = 0.004$ ). The  $AUC_{0-12}$   
201 of CS was significantly higher in male than female patients (354.8 vs 307.7,  $p = 0.004$ ). The  
202  $C_{max}$  and  $AUC_{0-12}$  of LFX and CS were significantly higher in patients with BMI  $\geq 18.5$  than those  
203 with BMI < 18.5. Patients with DM had significantly higher  $C_{max}$  of LFX (12.0 vs 11.1µg/ml;  $p =$   
204 0.014) and CS (42.4 vs 35.5µg/ml;  $p = 0.004$ ) than those without DM. The  $AUC_{0-12}$  of CS was also



205 significantly higher in those with DM than those without DM (388.7 vs 323.9 $\mu\text{g/ml.h}$ ;  $p = 0.004$ ).  
206 Patients who consumed alcohol had higher  $C_{\text{max}}$  and  $\text{AUC}_{0-12}$  of CS, the difference attaining  
207 statistical significance for  $\text{AUC}_{0-12}$  only (383.9 vs 323.4 $\mu\text{g/ml.h}$ ;  $p = 0.017$ ). Non-responding  
208 patients had significantly lower  $C_{\text{max}}$  (2.5 vs 2.9 $\mu\text{g/ml}$ ;  $p = 0.040$ ) and  $\text{AUC}_{0-12}$  (14.4 vs 16.8 $\mu\text{g/ml.h}$ ;  
209  $p = 0.034$ ) of ETH than responders at end of IP.

210 In multiple linear regression model, we determined factors that had an impact on  $C_{\text{max}}$  and  $\text{AUC}_{0-12}$   
211 of drugs. Using  $C_{\text{max}}$  as a dependent variable patients with  $\text{BMI} > 18.5\text{kg/m}^2$  were likely to have 1.4  
212 and 0.3 $\mu\text{g/ml}$  respectively of LFX and ETH  $C_{\text{max}}$  higher than those with  $\text{BMI} < 18.5\text{kg/m}^2$ . Patients  
213 with culture positive *M. tuberculosis* were likely have 0.4 $\mu\text{g/ml}$  ETH  $C_{\text{max}}$  lower than those with  
214 culture negative *M. tuberculosis*. An increase of one unit of drug dose taken was likely to cause  
215 increases in the  $C_{\text{max}}$  of PZA, MFX and INH by 0.5 $\mu\text{g/ml}$ , 0.3 $\mu\text{g/ml}$  and 0.7 $\mu\text{g/ml}$  respectively.

216 Using  $\text{AUC}_{0-12}$  as the dependent variable and adjusting for co-variates, age (LFX and ETH),  
217 gender (CS), BMI (LFX, ETH and CS), alcoholism (ETH), culture status (ETH), and mg/kg drug  
218 dose (ETH, PZA and MFX) were significant.

219 Of the 350 patients recruited to the study, status at end of IP were available for 303 patients in the  
220 NTEP records. Among them, 214 were responders, while 45 patients were non-responders at end  
221 of IP. Patients who had defaulted treatment ( $n = 44$ ) were excluded from analysis. The median  
222  $C_{\text{max}}$  (2.0 vs 2.9 $\mu\text{g/ml}$ ;  $p = 0.005$ ) and  $\text{AUC}_{0-12}$  (12.2 vs 17.0 $\mu\text{g/ml.h}$ ;  $p = 0.002$ ) of ETH were  
223 significantly lower in non-responders compared to responders (Figures 1A and B).

224 The influence of factors such as age, gender, body weight, smoking, alcohol use, DM and  
225  $C_{\text{max}}/\text{AUC}_{0-12}$  of LFX, ETH, CS, PZA, MFX and INH on end of IP status were tested. After  
226 excluding defaulters and adjusting for confounders,  $\text{AUC}_{0-12}$  of ETH was observed to significantly  
227 influence end of IP status (aOR - 1.065; 95% CI: 1.001 - 1.134;  $p = 0.047$ ). The chance of having  
228 culture negativity at end of IP was higher by having  $\text{AUC}_{0-12}$  of ETH increased by 7% (Table 6).

## 229 Discussion

230 Effective control of MDR TB remains a challenge since second-line anti-TB medications are less  
231 potent, may require longer treatment duration, have a narrow therapeutic range and have greater  
232 number of side effects than first-line drugs (14). Hence treatment outcomes for MDR TB remain  
233 sub-optimal compared to drug-susceptible TB. Furthermore, PK tools such as plasma drug  
234 concentrations and MIC testing are not readily available in most TB endemic settings and it  
235 remains unclear how such measurements are best utilised.

236 The importance of optimised drug exposure, leading to greater bacterial killing and better  
237 outcomes has been shown in both murine models and human experience (15 - 17). In this  
238 prospective cohort study, we have described the PK of anti-TB drugs used in the treatment of  
239 MDR TB in India, and factors that were likely to influence status at end of IP. A higher proportion

240 of patients had  $C_{max}$  of LFX, ETH, PZA and INH 900mg within the therapeutic range. While this is  
241 quite encouraging, we did observe a higher proportion of patients having  $C_{max}$  of CS, MFX, and  
242 INH 300/600mg above the therapeutic range. The reason for higher proportion of patients who  
243 received a relatively lower INH dose having  $C_{max}$  above the therapeutic range than those who  
244 received a higher dose remains unclear, although patients' INH acetylator status would have  
245 thrown some light on this issue. However, INH acetylator status was not determined in this study.  
246 Our finding of 58% of patients having  $C_{max}$  of CS above the therapeutic range is in agreement with  
247 that reported by Mpagama et al, which was 52% in their study (6). Using hollow fiber system  
248 model of TB, Deshpande et al, determined the susceptibility breakpoint of CS, and reported that  
249 drug doses required to achieve bacterial killing in patients was high, which was likely to cause  
250 toxicity (18). In this study, we did not observe major adverse events due to CS at the time of the  
251 PK sampling day. It should be pointed out that majority of the patients had their PK study  
252 conducted within 4 weeks of treatment initiation. Psychosis as a side effect due to CS generally  
253 shows up after a month of treatment; however, follow-up of patients beyond the PK study was not  
254 part of this study. .

255 Our observation that a small proportion of patients only had sub-therapeutic  $C_{max}$  points to the fact  
256 that drug doses used in the NTEP were quite adequate. A population PK study by Chigutsa and  
257 others in South African MDR TB patients reported a high proportion of patients failed to achieve  
258 the target ofloxacin exposure and suggested that LFX or MFX would be ideal fluoroquinolones to  
259 treat MDR TB (19). According to the PMDT guidelines in India, LFX was part of the multi-drug  
260 regimen and the revised shorter regimen had MFX in the place of LFX. Our observation of half of  
261 the patients having optimal  $C_{max}$  of LFX contradicts the findings of Mpagama et al, who reported  
262 LFX concentrations were frequently lower in MDR TB patients in Tanzania (6). Using nonlinear  
263 mixed-effects modelling, a population PK study of PZA suggested 1500mg, 1750mg and 2000mg  
264 PZA doses for MDR TB patients having weight bands upto 50kg, 51-70kg and above 70kg  
265 respectively (20). The PZA doses followed in the NTEP are almost similar to that recommended in  
266 the South African study.

267 A direct comparison of PK data of the drugs examined in this study could be compared with that  
268 reported by others, since the Korean study was performed in healthy volunteers (7) and the  
269 Tanzanian study examined drug concentrations only at 2 hours post-dosing (6). Furthermore,  
270 these studies were conducted in small numbers, 14 healthy volunteers and 25 patients.

271 Patients above 45 years of age seemed to have higher  $C_{max}$  and  $AUC_{0-12}$  of LFX, probably due to  
272 slower metabolism of the drug with aging. Female patients were observed to have higher  
273 exposure of CS than their male counterparts. Although not many studies have reported gender -  
274 based differences in second-line anti-TB medications, a similar trend has been observed with  
275 respect to first-line anti-TB drugs (21 - 23). Our finding of patients with higher BMI having higher



276  $C_{\max}$  and  $AUC_{0-12}$  of LFX and CS are not consistent with that reported with respect to first-line  
277 drugs (20). Multivariate regression analysis also seemed to show BMI having a direct relationship  
278 with drug concentrations. Likewise, higher LFX and CS concentrations observed in those with DM  
279 than those without DM is also not in line with certain reports on RMP, INH and PZA (21, 24, 25).  
280 While INH and PZA concentrations were lower in drug susceptible TB patients with DM than those  
281 without DM (25, 26), no differences were observed in the case of MDR TB patients with and  
282 without DM. It could be hypothesised that the metabolic pathways of drugs are different in patients  
283 with drug susceptible and drug resistant TB, although the possibility of drug-drug interactions  
284 cannot be ruled out. Nonetheless, this observation requires some attention and confirmation in  
285 other studies.

286 The study showed that non-responding patients to ATT having lower  $C_{\max}$  and  $AUC_{0-12}$  of ETH than  
287 responders is quite significant. We combined three different groups of patients as non-responders,  
288 which included those who required a change of regimen. According to the NTEP, MDR TB  
289 patients showing signs of clinical deterioration and becoming morbid have their treatment changed  
290 to a bedaquiline - containing regimen. Thus, culture positives at end of IP, clinical failures and  
291 deaths before completion of IP were combined and considered as non-responders. The PMDT  
292 guidelines in India, recommends ETH as part of the MDR TB treatment regimen both initially and  
293 in the revised regimen. Using a multidose hollow fiber system model, Deshpande et al,  
294 demonstrated that ETH had a reasonable kill rate and that it was an important contributor to MDR  
295 TB treatment regimens (27). Furthermore, suboptimal ETH exposure was likely to cause efflux  
296 pump - mediated acquired drug resistance. Our study findings of  $C_{\max}$  and  $AUC_{0-12}$  of ETH being  
297 higher in those who had culture conversion at end of IP than those who did not, and ETH  
298 exposure emerging as a significant factor impacting end-of-IP status (after adjusting for  
299 confounding factors and excluding defaulters) are consistent with the study of Deshpande and  
300 others (27). In the light of these findings, it is crucial to include ETH as a part of the MDR TB  
301 treatment regimen, and ensure that therapeutic concentrations of ETH are maintained.

302 In multivariate regression analysis, we demonstrated drug doses to have a significant influence on  
303 the plasma concentrations of ETH, PZA, MFX and INH, and there was a direct relationship.  
304 Increasing drug doses was likely to boost drug concentrations, although one needs to be cautious  
305 about occurrence of toxic effects.

306 Our study findings are based on data analysed from all the 350 patients. We also performed  
307 regimen-wise analysis. Of the drugs examined in this study, ETH and PZA were present in both  
308 the regimens. No striking differences were observed in the PK profile of drugs in either regimen.  
309 This observation was made with respect to patients maintaining therapeutic concentrations, group-  
310 wise comparisons and factors influencing drug PK. It should however be added that the study was  
311 not designed to examine drug-drug interactions, about which not much is known.

312 The strength of the study was the large sample size and understanding the association between  
313 drug concentrations and patients' status at end of IP. The study was however, limited by the fact  
314 that we did not follow up patients till end of treatment. Hence treatment outcomes and occurrence  
315 of adverse reactions to drugs were not known. However, assessing end-of-treatment outcome in  
316 MDR TB studies is quite cumbersome due to the long duration of treatment. Determination of INH  
317 acetylator status could have provided additional information.

318 In summary, this is the first report describing the PK of second-line anti-TB drugs in MDR TB  
319 patients in India. All patients were being treated according to the NTEP guidelines under direct  
320 supervision, ensuring treatment regularity. The study conducted in a fairly large, adequately  
321 powered sample size has demonstrated that the drug doses used currently in the programme  
322 produced optimal drug concentrations in majority of patients. ETH played a major role in the MDR  
323 TB combination regimen and was a key determinant of end-of-IP status. Future studies should  
324 adopt a comprehensive approach assessing drug exposure, individual minimum inhibitory  
325 concentrations and outcome. Researchers from China are aiming to conduct a translational study  
326 that would characterise second-line anti-TB drug exposures and relate them to individual MICs  
327 (28). It is important to carry out similar PK/PD studies in different parts of India, in order to  
328 generalise the findings.

### 329 **Acknowledgements**

330 The authors thank the patients who took part in the study, A Vijayakumar for drug estimations by  
331 HPLC, clinic nurses of NIRT for blood collections, and secretarial assistance by S. Sasikumar.

### 333 **Authors' contributions**

334 AKH and GR designed the study, AKH wrote the study protocol and obtained regulatory  
335 approvals, RS, PLN, SRK, DN and SK supervised patient recruitment, PLN and TB conducted the  
336 study, AKH supervised drug estimations, VS and TB performed drug estimations, NSG and AB  
337 supervised bacteriological investigations, TK performed statistical analysis and GR drafted the  
338 manuscript.

### 340 **Potential conflict of interest:** None

346

347

348

349

350

351

## References

352

1. Global TB report, 2019. Available at: [http://www.who.int/tb/publications/global\\_report/en/](http://www.who.int/tb/publications/global_report/en/)

353

2. RNTCP Guidelines for Programmatic Management of Drug Resistant Tuberculosis (PMDT) in India, 2012. Available at: <https://tbcindia.gov.in>

354

355

3. Thomas A, Ramachandran R, Rehman F, Jaggarajamma K, Santha T, Selvakumar N, Krishnan N, Nalini SM, Sundaram V, Fraser W, Narayanan PR. Management of multi-drug resistant tuberculosis in the field - Tuberculosis Research Centre experience. *Indian J Tub* 2007; 54: 117-124

356

357

358

359

4. Peloquin CA. Therapeutic drug monitoring in the treatment of tuberculosis. *Drugs* 2002; 62: 2169–2183

360

361

5. Chang MJ, Jin B, Chae J, Yun H, Kim ES, Lee YJ, Cho YJ, Yoon HI, Lee CT, Park KU, Song J, Lee JH, Park JS. Population pharmacokinetics of moxifloxacin, cycloserine, p-aminosalicylic acid and kanamycin for the treatment of multi-drug-resistant tuberculosis. *Int J Antimicrob Agents* 2017; 49 : 677-687. doi: 10.1016/j.ijantimicag.2017.01.024

362

363

364

365

6. Mpagama SG, Ndusilo N, Stroup S, Kumburu H, Peloquin CA, Gratz J, Houpt ER, Kibiki GS, Heysell SK. Plasma drug activity in patients on treatment for multi-drug resistant tuberculosis. *Antimicrob Agents Chemother*. 2014;58:782- 788. doi: 10.1128/AAC.01549-13

366

367

368

7. Park S, Oh J, Jang K, Yoon J, Moon SJ, Park SJ, Lee JH, Song J, Jang IJ, Yu KS, Chung JY. Pharmacokinetics of second-line antituberculosis drugs after multiple administrations in healthy volunteers. *Antimicrob Agents Chemother* 2015; 59: 4429 – 4435. doi: 10.1128/AAC.00354-15

369

370

371

372

8. Hemanth Kumar AK, Sudha V, Ramachandran G. A Simple and Rapid Liquid Chromatography method for determination of Levofloxacin in Plasma. *SAARC J TB, Lung Diseases & HIV/AIDS*, 2016; XIII: 28 - 33

373

374

375

9. Hemanth Kumar AK, Geetha Ramachandran. Simple and rapid liquid chromatography method for determination of moxifloxacin in plasma. *J Chromatogr B Analyt Technol Biomed Life Sci*, 2009; 877: 1205-1208. doi: 10.1016/j.jchromb.2009.02.042

376

377

378

10. Hemanth Kumar AK, Sudha V, Geetha Ramachandran. Simple and rapid liquid chromatography method for simultaneous determination of isoniazid and pyrazinamide in

379

- 380 plasma. SAARC J TB, Lung diseases & HIV/AIDS 2012; 9: 13 – 18.  
381 DOI: <https://doi.org/10.3126/saarctb.v9i1.6960>
- 382 11. Hemanth Kumar AK, Polisetty AK, Sudha V, Vijayakumar A, Geetha Ramachandran. A  
383 Selective and sensitive high performance liquid chromatography assay for the  
384 determination of cycloserine in human plasma. *Ind J Tub* 2018; 65: 118 – 123.  
385 doi: 10.1128/AAC.02410-17
- 386 12. Hemanth Kumar AK, Sudha V, Geetha Ramachandran. Simple and rapid high pressure  
387 liquid chromatography methods for estimation of ethionamide in plasma. *Asian J Biomed*  
388 *Pharmaceut Sci* 2014; 04: 1 - 5
- 389 13. Abdullah A, Peloquin CA. Therapeutic drug monitoring in the treatment of tuberculosis: an  
390 update. *Drugs* 2014; 74: 839-854. doi: 10.1007/s40265-014-0222-8
- 391 14. Sheno S, Heysell SK, Moll A, Friedland G. Multidrug-resistant and extensively drug-  
392 resistant tuberculosis: consequences for the global HIV community. *Curr Opin Infect*  
393 *Dis* 2009; 22:11–17. 10.1097/QCO.0b013e3283210020. doi:  
394 10.1097/QCO.0b013e3283210020
- 395 15. Zhang M, Li SY, Rosenthal IM, Almeida DV, Ahmad Z, Converse PJ, Peloquin CA,  
396 Neurmberger EL, Grosset JH. Treatment of tuberculosis with rifamycin containing  
397 regimens in immune-deficient mice. *Am J Respir Crit Care Med* 2011; 183:1254 – 1261.  
398 10.1164/rccm.201012-1949OC
- 399 16. Chang KC, Leung CC, Yew WW, Chan SL, Tam CM. Dosing schedules of 6-month  
400 regimens and relapse for pulmonary tuberculosis. *Am J Respir Crit Care Med* 2006;  
401 174:1153 –1158. 10.1164/rccm.200605-637OC
- 402 17. Egelund EF, Peloquin CA. Pharmacokinetic variability and tuberculosis treatment  
403 outcomes, including acquired drug resistance. *Clin Infect Dis* 2012; 55:178–179.  
404 10.1093/cid/cis366
- 405 18. Devyani D, Alffenaar JW, Kose CU, Dheda K, Chapagain ML, Simbar N, Schon T,  
406 Sturkenboom MGG, McIlleron H, Lee PS, Koeuth T, Mpagama SG, Banu S, Foongladda S,  
407 Ogarkov O, Pholwat S, Houpt ER, Heysell SK, Gumbo T. D-Cycloserine  
408 Pharmacokinetics/Pharmacodynamics susceptibility and dosing implications in multidrug-  
409 resistant tuberculosis: A Faustian deal. *Clin Infect Dis* 2018; 67: S308-316. doi:  
410 10.1093/cid/ciy624
- 411 19. Chigutsa E, Meredith S, Wiesner L, Padayatchi N, Harding J, Moodley P, Mac Kenzie WR,  
412 Weiner M, McIlleron H, Kirkpatrick CMJ. Population pharmacokinetics of ofloxacin in South  
413 African patients with multi-drug resistant tuberculosis. *Antimicrob Agents Chemother* 2012;  
414 56: 3857-3863. doi: 10.1128/AAC.00048-12
- 415 20. Chirehwa MT, McIlleron H, Rustomjee R, Mthiyane T, Onyebujoh P, Smith P, Denti P.  
416 Pharmacokinetics of pyrazinamide and optimal dosing regimens for drug-sensitive and

- 417 resistant tuberculosis. *Antimicrob Agents Chemother.* 2017;61:1-11. doi:  
418 10.1128/AAC.00490-17
- 419 21. A K Hemanth Kumar, T Kannan, V Chandrasekaran, V Sudha, A Vijayakumar, K Ramesh,  
420 J Lavanya, Soumya Swaminathan, Geetha Ramachandran. Pharmacokinetics of thrice  
421 weekly rifampicin, isoniazid and pyrazinamide in adult tuberculosis patients in India. *Int J*  
422 *Tuberc Lung Dis* 2016; 20:1236-1241. doi: 10.5588/ijtld.16.0048
- 423 22. McIlleron H, Wash P, Burger A, Norman J, Folb PI, Smith P. Determinants of rifampin,  
424 isoniazid, pyrazinamide and ethambutol pharmacokinetics in a cohort of tuberculosis  
425 patients. *Antimicrob Agents Chemother* 2006; 50: 1170 – 1177
- 426 23. Ray J, Gardiner I, Marriott D. Managing antituberculosis drug therapy by therapeutic drug  
427 monitoring of rifampicin and isoniazid. *Intern Med J* 2003; 33:229 – 234
- 428 24. Nijland HM, Ruslami JR, Stalenhoef JE, Nelwan EJ, Alisjahbana B, Nelwan RHH, van der  
429 Ven JAM, Danusantoso H, Aarnoutse RE, van Crevel R. Exposure of Rifampin is strongly  
430 reduced in tuberculosis patients with type 2 diabetes. *Clin Infect Dis* 2006; 43: 848 – 854
- 431 25. Hemanth Kumar AK, Chandrasekaran V, Kannan T, Lakshmi Murali, Lavanya J, Sudha V,  
432 Soumya Swaminathan, Geetha Ramachandran. Anti-tuberculosis drug concentrations in  
433 tuberculosis patients with and without diabetes mellitus. *Eur J Clin Pharmacol* 2017; 73: 65  
434 – 70. doi: 10.1007/s00228-016-2132-z
- 435 26. Babalik A, Ulus IH, Bakirci N, Kuyucu T, Arpag H, Dagyildizi L, Capaner E. Plasma  
436 Concentrations of Isoniazid and Rifampin are decreased in adult pulmonary tuberculosis  
437 patients with diabetes mellitus. *Antimicrob Agents Chemother.* 2013; 5740 – 5742. doi:  
438 10.1128/AAC.01345-13
- 439 27. Deshpande D, Pasipanodya JG, Mpagama SG, Srivastava S, Bendet P, Koeuth T, Lee PS,  
440 Heysell SK, Gumbo T. Ethionamide Pharmacokinetics/Pharmacodynamics- derived dose,  
441 the role of MICs in clinical outcome, and the resistance arrow of time in multidrug-resistant  
442 tuberculosis. *Clin Infect Dis* 2018; 67 :S317-326. doi: 10.1093/cid/ciy609
- 443 28. Forsman LD, Niward K, Hu Y, Zheng R, Zheng X, Ke R, Cai W, Hong C, Li Y, Gao Y,  
444 Werngren J, Paues J, Kuhlín J, Simonsson USH, Eliasson E, Alffenaar JW, Mansjo M,  
445 Hoffner S, Xu B, Schon T, Brushfeld J. Plasma concentrations of second-line anti-  
446 tuberculosis drugs in relation to minimum inhibitory concentrations in multidrug-resistant  
447 tuberculosis patients in China: a study protocol of a prospective observational cohort study.  
448 *BMJ Open* 2018; 4;8:e023899. doi: 10.1136/bmjopen-2018-023899

449

450

451

452  
453  
454  
455  
456  
457  
458  
459  
460  
461  
462  
463

**Table 1: Drug doses and weight bands followed in the PMDT guidelines**

| <b>INTENSIVE PHASE (6 MONTHS)</b>     |                   |                   |                   |                    |
|---------------------------------------|-------------------|-------------------|-------------------|--------------------|
| <b>DRUGS</b>                          | <b>16 - 29 kg</b> | <b>30 - 45 kg</b> | <b>46 - 70 kg</b> | <b>ABOVE 70 kg</b> |
| <b>LFX</b>                            | 250               | 750               | 1000              | 1000               |
| <b>ETH</b>                            | 375               | 500               | 750               | 1000               |
| <b>CS</b>                             | 250               | 500               | 750               | 1000               |
| <b>EMB</b>                            | 400               | 800               | 1200              | 1600               |
| <b>PZA</b>                            | 750               | 1250              | 1750              | 2000               |
| <b>KM</b>                             | 500               | 750               | 750               | 1000               |
| <b>CONTINUATION PHASE (18 MONTHS)</b> |                   |                   |                   |                    |
| <b>DRUGS</b>                          | <b>16 - 29 kg</b> | <b>30 - 45 kg</b> | <b>46 - 70 kg</b> | <b>ABOVE 70 kg</b> |
| <b>LFX</b>                            | 250               | 750               | 1000              | 1000               |
| <b>ETH</b>                            | 375               | 500               | 750               | 1000               |
| <b>CS</b>                             | 250               | 500               | 750               | 1000               |
| <b>EMB</b>                            | 400               | 800               | 1200              | 1600               |
| <b>MDR SHORTER REGIMEN</b>            |                   |                   |                   |                    |
| <b>INTENSIVE PHASE (4 - 6 MONTHS)</b> |                   |                   |                   |                    |
| <b>DRUGS</b>                          | <b>16 - 29 kg</b> | <b>30 - 45 kg</b> | <b>46 - 70 kg</b> | <b>ABOVE 70 kg</b> |
| <b>HIGH DOSE MFX</b>                  | 400               | 600               | 800               | 800                |
| <b>HIGH DOSE INH</b>                  | 300               | 600               | 900               | 900                |
| <b>PZA</b>                            | 750               | 1250              | 1750              | 2000               |
| <b>ETH</b>                            | 375               | 500               | 750               | 1000               |
| <b>CFZ</b>                            | 50                | 100               | 100               | 200                |
| <b>EMB</b>                            | 400               | 800               | 1200              | 1600               |



464  
465  
466  
467  
468  
469  
470  
471  
472  
473  
474  
475  
476  
477  
478  
479  
480  
481

|                                       |                   |                   |                   |                    |
|---------------------------------------|-------------------|-------------------|-------------------|--------------------|
| <b>KM</b>                             | 500               | 750               | 750               | 1000               |
| <b>CONTINUATION PHASE ( 5 MONTHS)</b> |                   |                   |                   |                    |
| <b>DRUGS</b>                          | <b>16 - 29 kg</b> | <b>30 - 45 kg</b> | <b>46 - 70 kg</b> | <b>ABOVE 70 kg</b> |
| <b>MFX</b>                            | 400               | 600               | 800               | 800                |
| <b>CFZ</b>                            | 50                | 100               | 100               | 200                |
| <b>PZA</b>                            | 750               | 1250              | 1750              | 2000               |
| <b>EMB</b>                            | 400               | 800               | 1200              | 1600               |

LFX - Levofloxacin; ETH - Ethionamide; CS - Cycloserine; EMB - Ethambutol; PZA - Pyrazinamide; KM - Kanamycin

**Table 2: Patient Details (n = 350)**

| <b>Parameters</b>                          | <b>n (%)</b> |
|--------------------------------------------|--------------|
| <b>Age, years, Median (IQR)</b>            | 45 (34 - 55) |
| <b>Gender</b>                              |              |
| Female                                     | 62 (17.7%)   |
| Male                                       | 288 (82.3%)  |
| <b>BMI, kg/m<sup>2</sup>, Median (IQR)</b> |              |
| <18.5                                      | 218 (62.3%)  |
| ≥ 18.5                                     | 132 (37.7%)  |
| <b>Diabetes</b>                            |              |
| No                                         | 203 (58.0%)  |
| Yes                                        | 147 (42.0%)  |
| <b>Smoking Status</b>                      |              |
| No                                         | 249 (71.1%)  |
| Yes                                        | 101 (28.9%)  |
| <b>Alcoholism</b>                          |              |
| No                                         | 236 (67.4%)  |
| Yes                                        | 114 (32.6%)  |
| <b>Type of TB</b>                          |              |
| Extra Pulmonary TB                         | 10 (2.9%)    |

| <b>Parameters</b>                   | <b>n (%)</b>       |
|-------------------------------------|--------------------|
| <b>Pulmonary TB</b>                 | 340 (97.1%)        |
| <b>Past History of TB</b>           |                    |
| No                                  | 31 (8.9%)          |
| Yes                                 | 319 (91.1%)        |
| <b>Category of ATT</b>              |                    |
| Category I                          | 49 (14.0%)         |
| Category II                         | 246 (70.3%)        |
| Others                              | 55 (15.7%)         |
| <b>Smear Status</b>                 |                    |
| Negative                            | 105 (30.0%)        |
| Positive                            | 245 (70.0%)        |
| <b>Culture Status</b>               |                    |
| Negative                            | 110 (31.4%)        |
| Positive                            | 240 (68.6%)        |
| <b>Biochemical Parameters</b>       |                    |
| Haemoglobin (g/dl)                  | 11.8 (10.5 - 13.4) |
| Glucose (mg/dl)                     | 127 (98.5 - 231.5) |
| Creatinine (mg/dl)                  | 0.9 (0.7 - 1.0)    |
| Alanine Pyruvate Transaminase (U/L) | 25 (20 - 29)       |
| <b>Dose mg/kg body weight</b>       |                    |
| Moxifloxacin                        | 15.0 (13.0 - 16.2) |
| Levofloxacin                        | 18.8 (17.4 - 20.8) |
| Ethionamide                         | 13.5 (12.5 - 15.0) |
| Cycloserine                         | 13.6 (12.5 - 15.0) |
| Isoniazid                           | 15.4 (13.8 - 17.3) |
| Pyrazinamide                        | 30.0 (27.8 - 33.0) |
| Ethambutol                          | 21.6 (19.7 - 24.0) |

**Table 3: Pharmacokinetic parameters of drugs**  
(Values are given as Median & Inter quartile range)

| PK Parameters                                  | Levofloxacin<br>n = 252 | Ethionamide<br>n = 259 | Cycloserine<br>n = 235   | Pyrazinamide<br>n = 300  | Moxifloxacin<br>n = 69 | Isoniazid<br>(300/600mg dose)<br>n = 40 | Isoniazid<br>(900mg dose)<br>n = 23 |
|------------------------------------------------|-------------------------|------------------------|--------------------------|--------------------------|------------------------|-----------------------------------------|-------------------------------------|
| C <sub>max</sub> , µg/ml                       | 11.6<br>(9.3 - 14.4)    | 2.5<br>(2.0 - 2.5)     | 37.5<br>(28.3 - 47.9)    | 48.9<br>(38.7 - 60.3)    | 5.6<br>(3.9 - 8.1)     | 10.5<br>(7.8 - 15.9)                    | 11.8<br>(7.2 - 19.5)                |
| T <sub>max</sub> , h                           | 2<br>(1 - 4)            | 2<br>(2 - 2)           | 2<br>(2 - 4)             | 2<br>(2 - 4)             | 2<br>(2 - 4)           | 2<br>(1 - 2)                            | 2<br>(1 - 2)                        |
| AUC <sub>0-12</sub> , µg/ml.h                  | 88.6<br>(69.7 - 111.4)  | 15.2<br>(10.5 - 15.2)  | 344.3<br>(263.8 - 454.6) | 453.9<br>(336.4 - 576.6) | 43.1<br>(30.1 - 64.9)  | 58.3<br>(40.0 - 102.4)                  | 74.6<br>(36.7 - 113.1)              |
| T <sub>1/2</sub> , h                           | 8.0<br>(6.2 - 11.2)     | 3.4<br>(2.2 - 3.4)     | 16.3<br>(11.6 - 24.1)    | 12.7<br>(9.6 - 16.8)     | 7.0<br>(5.7 - 8.8)     | 4.8<br>(3.6 - 6.3)                      | 4.7<br>(3.5 - 6.6)                  |
| <b>No (%) of Patients with C<sub>max</sub></b> |                         |                        |                          |                          |                        |                                         |                                     |
| Below therapeutic Range                        | 34 (13.5%)              | 71 (27.4%)             | 16 (6.8%)                | 10 (3.3%)                | 7 (10.1%)              | 3 (7.5%)                                | 6 (26.1%)                           |
| Within therapeutic Range                       | 126 (50.0%)             | 171 (66.0%)            | 83 (35.3%)               | 211 (70.3%)              | 22 (31.9%)             | 3 (7.5%)                                | 11 (47.8%)                          |
| Above therapeutic Range                        | 92 (36.5%)              | 17 (6.6%)              | 136 (57.9%)              | 79 (26.3%)               | 40 (58.0%)             | 34 (85.0%)                              | 6 (26.1%)                           |

483

484 Therapeutic Range: LFX: 8 – 13 µg/ml; ETH: 2 – 5 µg/ml; CS: 20 – 35 µg/ml; PZA: 20 – 60 µg/ml; MFX: 3 – 5 µg/ml; INH: 3 – 6 µg/ml; C<sub>max</sub> = Peak

485 Concentration; T<sub>max</sub> = Time at which peak concentration was attained; AUC = area under the time concentration curve; T<sub>1/2</sub> = half-life

486

487

488

Table 4: C<sub>max</sub> of drugs among different patient groups

| Parameters                   | Levofloxacin<br>(µg/ml) |                    | Ethionamide<br>(µg/ml) |                 | Cycloserine<br>(µg/ml) |                    | Pyrazinamide<br>(µg/ml) |                    | Moxifloxacin<br>(µg/ml) |                 | Isoniazid<br>(µg/ml) |                   |
|------------------------------|-------------------------|--------------------|------------------------|-----------------|------------------------|--------------------|-------------------------|--------------------|-------------------------|-----------------|----------------------|-------------------|
|                              | n                       | Median (IQR)       | n                      | Median (IQR)    | n                      | Median (IQR)       | n                       | Median (IQR)       | n                       | Median (IQR)    | n                    | Median (IQR)      |
| <b>Age, years</b>            |                         |                    |                        |                 |                        |                    |                         |                    |                         |                 |                      |                   |
| <45                          | 128                     | 11.2 (9.1 - 13.7)  | 121                    | 2.4 (1.9 - 3.4) | 120                    | 37.0(28.3 - 45.4)  | 140                     | 50.6 (39.4 - 59.8) | 26                      | 5.1 (3.6 - 7.4) | 25                   | 9.9 (7.8 - 14.2)  |
| ≥45                          | 124                     | 12.0 (9.6 - 15.9)  | 138                    | 2.7 (2.0 - 3.8) | 115                    | 38.5 (28.3 - 48.7) | 160                     | 47.9 (37.8 - 60.5) | 43                      | 5.7 (4.1 - 8.1) | 38                   | 13.1 (7.9 - 16.9) |
| P Value                      |                         | 0.041              |                        | 0.151           |                        | 0.222              |                         | 0.791              |                         | 0.396           |                      | 0.232             |
| <b>Gender</b>                |                         |                    |                        |                 |                        |                    |                         |                    |                         |                 |                      |                   |
| Female                       | 38                      | 11.6 (9.3 - 15.1)  | 37                     | 2.5 (1.9 - 3.9) | 34                     | 33.6 (26.5 - 40.6) | 57                      | 52.1 (41.1 - 59.6) | 20                      | 5.2 (3.9 - 7.0) | 18                   | 11.5 (7.5 - 16.1) |
| Male                         | 214                     | 11.6 (9.4 - 14.3)  | 222                    | 2.6 (2.0 - 3.6) | 201                    | 37.9 (29.2 - 48.1) | 243                     | 48.6 (38.2 - 60.5) | 49                      | 5.7 (3.9 - 8.1) | 45                   | 11.1 (7.9 - 15.7) |
| P Value                      |                         | 0.759              |                        | >0.99           |                        | 0.071              |                         | 0.802              |                         | 0.832           |                      | 0.796             |
| <b>BMI, kg/m<sup>2</sup></b> |                         |                    |                        |                 |                        |                    |                         |                    |                         |                 |                      |                   |
| <18.5                        | 157                     | 11.2 (8.7 - 13.7)  | 151                    | 2.5 (1.8 - 3.5) | 147                    | 36.2 (27.5 - 46.1) | 184                     | 47.9 (38.3 - 60.9) | 41                      | 6.1 (4.1 - 8)   | 41                   | 11.1 (7.8 - 15.7) |
| ≥18.5                        | 95                      | 12.2 (10.9 - 15.1) | 108                    | 2.6 (2.1 - 3.9) | 88                     | 42.5 (31.6 - 48.4) | 116                     | 50.1 (39.5 - 60.0) | 28                      | 5.0 (3.5 - 8.2) | 22                   | 10.7 (8.0 - 19.5) |
| P Value                      |                         | 0.004              |                        | 0.051           |                        | 0.025              |                         | 0.977              |                         | 0.396           |                      | 0.806             |
| <b>Smoking Status</b>        |                         |                    |                        |                 |                        |                    |                         |                    |                         |                 |                      |                   |
| No                           | 177                     | 11.6 (9.4 - 13.8)  | 182                    | 2.5 (2.0 - 3.6) | 167                    | 37.2 (27.5 - 48.6) | 214                     | 50.9 (38.2 - 60.2) | 52                      | 5.5 (3.9 - 7.8) | 48                   | 11 (7.6 - 16.3)   |
| Yes                          | 75                      | 11.6 (8.7 - 15.6)  | 77                     | 2.8 (2.0 - 3.9) | 68                     | 38.9 (30.8 - 47.5) | 86                      | 47.7 (39.5 - 61.3) | 17                      | 5.7 (4.3 - 8.2) | 15                   | 12.4 (7.9 - 14.6) |
| P Value                      |                         | 0.814              |                        | 0.611           |                        | 0.406              |                         | 0.960              |                         | 0.723           |                      | 0.987             |
| <b>Alcoholism</b>            |                         |                    |                        |                 |                        |                    |                         |                    |                         |                 |                      |                   |
| No                           | 166                     | 11.4 (9.4 - 13.8)  | 171                    | 2.5 (1.9 - 3.6) | 153                    | 36.2 (27.3 - 46.1) | 200                     | 50.4 (37.8 - 60.1) | 50                      | 5.6 (3.9 - 8.2) | 46                   | 10.9 (7.2 - 16.6) |
| Yes                          | 86                      | 11.8 (8.9 - 15.6)  | 88                     | 2.9 (2.0 - 3.9) | 82                     | 39.7 (31.2 - 48.3) | 100                     | 48.0 (39.4 - 62.2) | 19                      | 5.6 (3.8 - 8.0) | 17                   | 12.4 (9.1 - 14.3) |
| P Value                      |                         | 0.419              |                        | 0.258           |                        | 0.055              |                         | 0.879              |                         | 0.523           |                      | 0.733             |
| <b>Diabetes</b>              |                         |                    |                        |                 |                        |                    |                         |                    |                         |                 |                      |                   |
| No                           | 141                     | 11.1 (9.0 - 13.7)  | 147                    | 2.5 (2.0 - 3.6) | 134                    | 35.5 (27.4 - 45.1) | 172                     | 50.7 (39.3 - 60.4) | 43                      | 5.6 (4.0 - 8.0) | 43                   | 12.4 (7.8 - 16.1) |
| Yes                          | 111                     | 12.0 (10.0 - 15.1) | 112                    | 2.6 (1.9 - 3.9) | 101                    | 42.4 (31.2 - 49.4) | 128                     | 48.0 (37.8 - 60.3) | 26                      | 5.6 (3.9 - 8.2) | 20                   | 9.6 (6.4 - 17.3)  |
| P Value                      |                         | 0.014              |                        | 0.891           |                        | 0.004              |                         | 0.683              |                         | 0.911           |                      | 0.516             |
| <b>Culture Status</b>        |                         |                    |                        |                 |                        |                    |                         |                    |                         |                 |                      |                   |
| Negative                     | 59                      | 11.6 (9.1 - 14.6)  | 84                     | 2.9 (2.0 - 3.8) | 52                     | 37.1 (27.2 - 46.0) | 96                      | 50.1 (40.0 - 58.9) | 39                      | 5.4 (3.9 - 8.2) | 35                   | 13.6 (8.5 - 16.1) |
| Positive                     | 193                     | 11.5 (9.4 - 14.3)  | 175                    | 2.5 (1.9 - 3.6) | 183                    | 37.6 (29.2 - 48.3) | 204                     | 48.7 (37.4 - 60.5) | 30                      | 5.7 (4.0 - 8.0) | 28                   | 9.5 (6.6 - 15.8)  |
| P Value                      |                         | 0.857              |                        | 0.040           |                        | 0.525              |                         | 0.854              |                         | 0.785           |                      | 0.125             |

491  
492

**Table 5: AUC<sub>0-12</sub> of drugs among different patient groups**

| Parameters                   | Levofloxacin<br>(µg/ml) |                     | Ethionamide<br>(µg/ml) |                    | Cycloserine<br>(µg/ml) |                       | Pyrazinamide<br>(µg/ml) |                       | Moxifloxacin<br>(µg/ml) |                    | Isoniazid<br>(µg/ml) |                     |
|------------------------------|-------------------------|---------------------|------------------------|--------------------|------------------------|-----------------------|-------------------------|-----------------------|-------------------------|--------------------|----------------------|---------------------|
|                              | n                       | Median (IQR)        | n                      | Median (IQR)       | n                      | Median (IQR)          | n                       | Median (IQR)          | n                       | Median (IQR)       | n                    | Median (IQR)        |
| <b>Age, years</b>            |                         |                     |                        |                    |                        |                       |                         |                       |                         |                    |                      |                     |
| <45                          | 128                     | 82.0 (67.0 - 105.2) | 121                    | 13.6 (10.0 - 20.4) | 120                    | 329.6 (260.6 - 436.1) | 140                     | 458.0 (336.4 - 560.3) | 26                      | 38.2 (27.1 - 60.3) | 25                   | 58.0 (40.6 - 83.8)  |
| ≥45                          | 124                     | 94.7 (73.6 - 119.6) | 138                    | 15.9 (11.3 - 21.8) | 115                    | 353.3 (266.6 - 466.2) | 160                     | 448.1 (335.4 - 605.0) | 43                      | 44.7 (32.1 - 69.9) | 38                   | 75.7 (39.7 - 112.4) |
| P Value                      | 0.004                   |                     | 0.076                  |                    | 0.117                  |                       | 0.637                   |                       | 0.373                   |                    | 0.232                |                     |
| <b>Gender</b>                |                         |                     |                        |                    |                        |                       |                         |                       |                         |                    |                      |                     |
| Female                       | 38                      | 82.1 (61.5 - 103.8) | 37                     | 13.4 (10.0 - 21.1) | 34                     | 307.7 (227.1 - 392.3) | 57                      | 423.2 (313.1 - 552.2) | 20                      | 36.7 (30.4 - 53.0) | 18                   | 66.4 (43.4 - 102.3) |
| Male                         | 214                     | 89.9 (70.3 - 113.0) | 222                    | 15.4 (11.3 - 20.8) | 201                    | 354.8 (267.0 - 460.1) | 243                     | 454.7 (339.1 - 594.2) | 49                      | 47.9 (30.1 - 69.9) | 45                   | 65.2 (39.7 - 102.4) |
| P Value                      | 0.134                   |                     | 0.716                  |                    | 0.004                  |                       | 0.269                   |                       | 0.308                   |                    | 0.704                |                     |
| <b>BMI, kg/m<sup>2</sup></b> |                         |                     |                        |                    |                        |                       |                         |                       |                         |                    |                      |                     |
| <18.5                        | 157                     | 85.2 (66.0 - 108.9) | 151                    | 13.7 (9.9 - 20.3)  | 147                    | 322.7 (260.2 - 447.7) | 184                     | 443.7 (335.2 - 591.3) | 41                      | 49.3 (32.4 - 64.2) | 41                   | 63.9 (39.7 - 97.1)  |
| ≥18.5                        | 95                      | 94.3 (75.8 - 112.9) | 108                    | 15.7 (11.7 - 21.9) | 88                     | 401.6 (296.6 - 457.4) | 116                     | 468.4 (336.9 - 568.9) | 28                      | 36.7 (29.1 - 67.4) | 22                   | 75.4 (40.6 - 113.1) |
| P Value                      | 0.048                   |                     | 0.060                  |                    | 0.015                  |                       | 0.629                   |                       | 0.406                   |                    | 0.395                |                     |
| <b>Smoking Status</b>        |                         |                     |                        |                    |                        |                       |                         |                       |                         |                    |                      |                     |
| No                           | 177                     | 87.8 (69.8 - 112.9) | 182                    | 15.2 (10.4 - 21.1) | 167                    | 333.1 (258.2 - 454.6) | 214                     | 451.5 (333.9 - 573.7) | 52                      | 42.0 (29.8 - 62.3) | 48                   | 64.8 (40.0 - 104.1) |
| Yes                          | 75                      | 90.7 (68.9 - 111.4) | 77                     | 15.4 (11.3 - 20.4) | 68                     | 369.5 (287.7 - 453.5) | 86                      | 454.9 (341.8 - 594.2) | 17                      | 44.7 (32.1 - 71.3) | 15                   | 65.2 (39.7 - 97.1)  |
| P Value                      | 0.579                   |                     | 0.905                  |                    | 0.218                  |                       | 0.671                   |                       | 0.568                   |                    | 0.910                |                     |
| <b>Alcoholism</b>            |                         |                     |                        |                    |                        |                       |                         |                       |                         |                    |                      |                     |
| No                           | 166                     | 87.5 (67.4 - 111.3) | 171                    | 14.4 (10.0 - 20.8) | 153                    | 323.4 (251.3 - 446.8) | 200                     | 457.5 (332.2 - 574.2) | 50                      | 42.0 (30.1 - 64.9) | 46                   | 64.8 (36.7 - 103.8) |
| Yes                          | 86                      | 90.8 (70.6 - 117.6) | 88                     | 17.6 (11.5 - 21.4) | 82                     | 383.9 (302.6 - 466.2) | 100                     | 451.0 (347.0 - 580.0) | 19                      | 43.5 (29.4 - 66.8) | 17                   | 65.2 (40.6 - 85.2)  |
| P Value                      | 0.321                   |                     | 0.226                  |                    | 0.017                  |                       | 0.754                   |                       | 0.747                   |                    | 0.865                |                     |
| <b>Diabetes</b>              |                         |                     |                        |                    |                        |                       |                         |                       |                         |                    |                      |                     |
| No                           | 141                     | 84.3 (65.6 - 108.9) | 147                    | 14.1 (10.8 - 21.4) | 134                    | 323.9 (251.2 - 430.4) | 172                     | 460.6 (339.9 - 583.4) | 43                      | 43.1 (31.6 - 64.2) | 43                   | 73.3 (39.7 - 102.4) |
| Yes                          | 111                     | 93.8 (75.8 - 112.9) | 112                    | 15.5 (10.4 - 20.4) | 101                    | 388.7 (300.5 - 466.2) | 128                     | 449.5 (333.6 - 571.6) | 26                      | 42.3 (29.5 - 69.8) | 20                   | 56.2 (38.7 - 107.7) |
| P Value                      | 0.183                   |                     | 0.989                  |                    | 0.004                  |                       | 0.635                   |                       | 0.862                   |                    | 0.690                |                     |
| <b>Culture Status</b>        |                         |                     |                        |                    |                        |                       |                         |                       |                         |                    |                      |                     |
| Negative                     | 59                      | 87.1 (67.0 - 114.5) | 84                     | 16.8 (11.4 - 23.0) | 52                     | 337.6 (238.6 - 437.1) | 96                      | 453.9 (336.9 - 560.6) | 39                      | 41.1 (29.4 - 64.9) | 35                   | 78.2 (48.3 - 104.3) |
| Positive                     | 193                     | 89.4 (70.3 - 109.0) | 175                    | 14.4 (10.0 - 20.2) | 183                    | 348.8 (264.1 - 459.1) | 204                     | 454.1 (335.6 - 591.9) | 30                      | 43.3 (32.4 - 66.8) | 28                   | 49.9 (36.8 - 82.0)  |
| P Value                      | 0.933                   |                     | 0.034                  |                    | 0.250                  |                       | 0.933                   |                       | 0.654                   |                    | 0.638                |                     |

493

**Table 6: Impact of drug levels on status at end of intensive phase**

| Drug       | Peak Concentration       |         |                          |         | Exposure                 |         |                          |         |
|------------|--------------------------|---------|--------------------------|---------|--------------------------|---------|--------------------------|---------|
|            | OR (95% CI)              | P Value | aOR (95% CI)             | P Value | OR (95% CI)              | P Value | aOR (95% CI)             | P Value |
| <b>LFX</b> | 0.993<br>(0.915 - 1.078) | 0.872   | 1.001<br>(0.919 - 1.090) | >0.950  | 0.999<br>(0.990 - 1.008) | 0.802   | 0.999<br>(0.990 - 1.009) | 0.875   |
| <b>ETH</b> | 1.321<br>(0.931 - 1.874) | 0.118   | 1.262<br>(0.885 - 1.799) | 0.198   | 1.068<br>(1.005 - 1.136) | 0.034   | 1.065<br>(1.001 - 1.134) | 0.047   |
| <b>CS</b>  | 1.014<br>(0.986 - 1.043) | 0.332   | 1.010<br>(0.981 - 1.041) | 0.503   | 1.002<br>(0.999 - 1.004) | 0.273   | 1.001<br>(0.998 - 1.004) | 0.498   |
| <b>PZA</b> | 0.992<br>(0.972 - 1.012) | 0.429   | 0.993<br>(0.974 - 1.014) | 0.523   | 0.999<br>(0.997 - 1.001) | 0.509   | 0.999<br>(0.997 - 1.001) | 0.523   |
| <b>INH</b> | 0.974<br>(0.828 - 1.144) | 0.745   | 0.960<br>(0.799 - 1.240) | 0.814   | 1.000<br>(0.974 - 1.026) | >0.950  | 1.043<br>(0.980 - 1.040) | 0.912   |
| <b>MFX</b> | 0.821<br>(0.557 - 1.210) | 0.318   | 0.880<br>(0.520 - 1.490) | 0.451   | 0.976<br>(0.930 - 1.025) | 0.333   | 0.990<br>(0.910 - 1.240) | 0.512   |

Odds ratio was calculated after adjusting for the factors such as age, gender, body weight, smoking status, alcoholism and diabetes mellitus



498 **Figure 1: Boxplot (Median & IQR) comparing  $C_{max}$  (A) and  $AUC_{0-12}$  (B) of drugs between responders and non-responders**

499 **A**

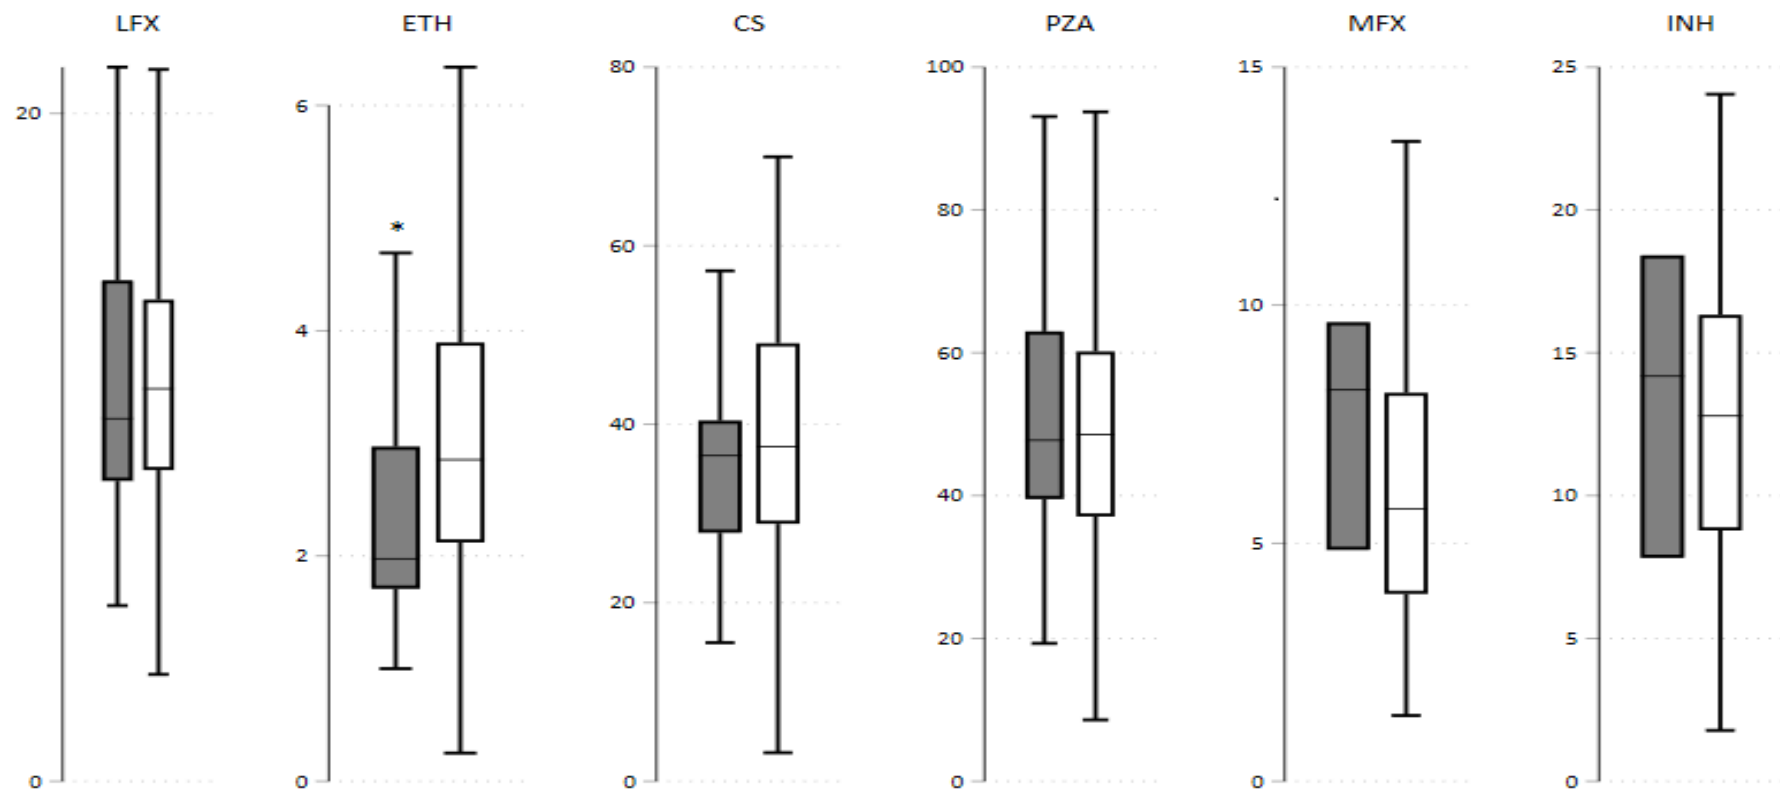

\*Statistically significant ( $p=0.005$ )

■ Non-responders    □ Responders

500

501

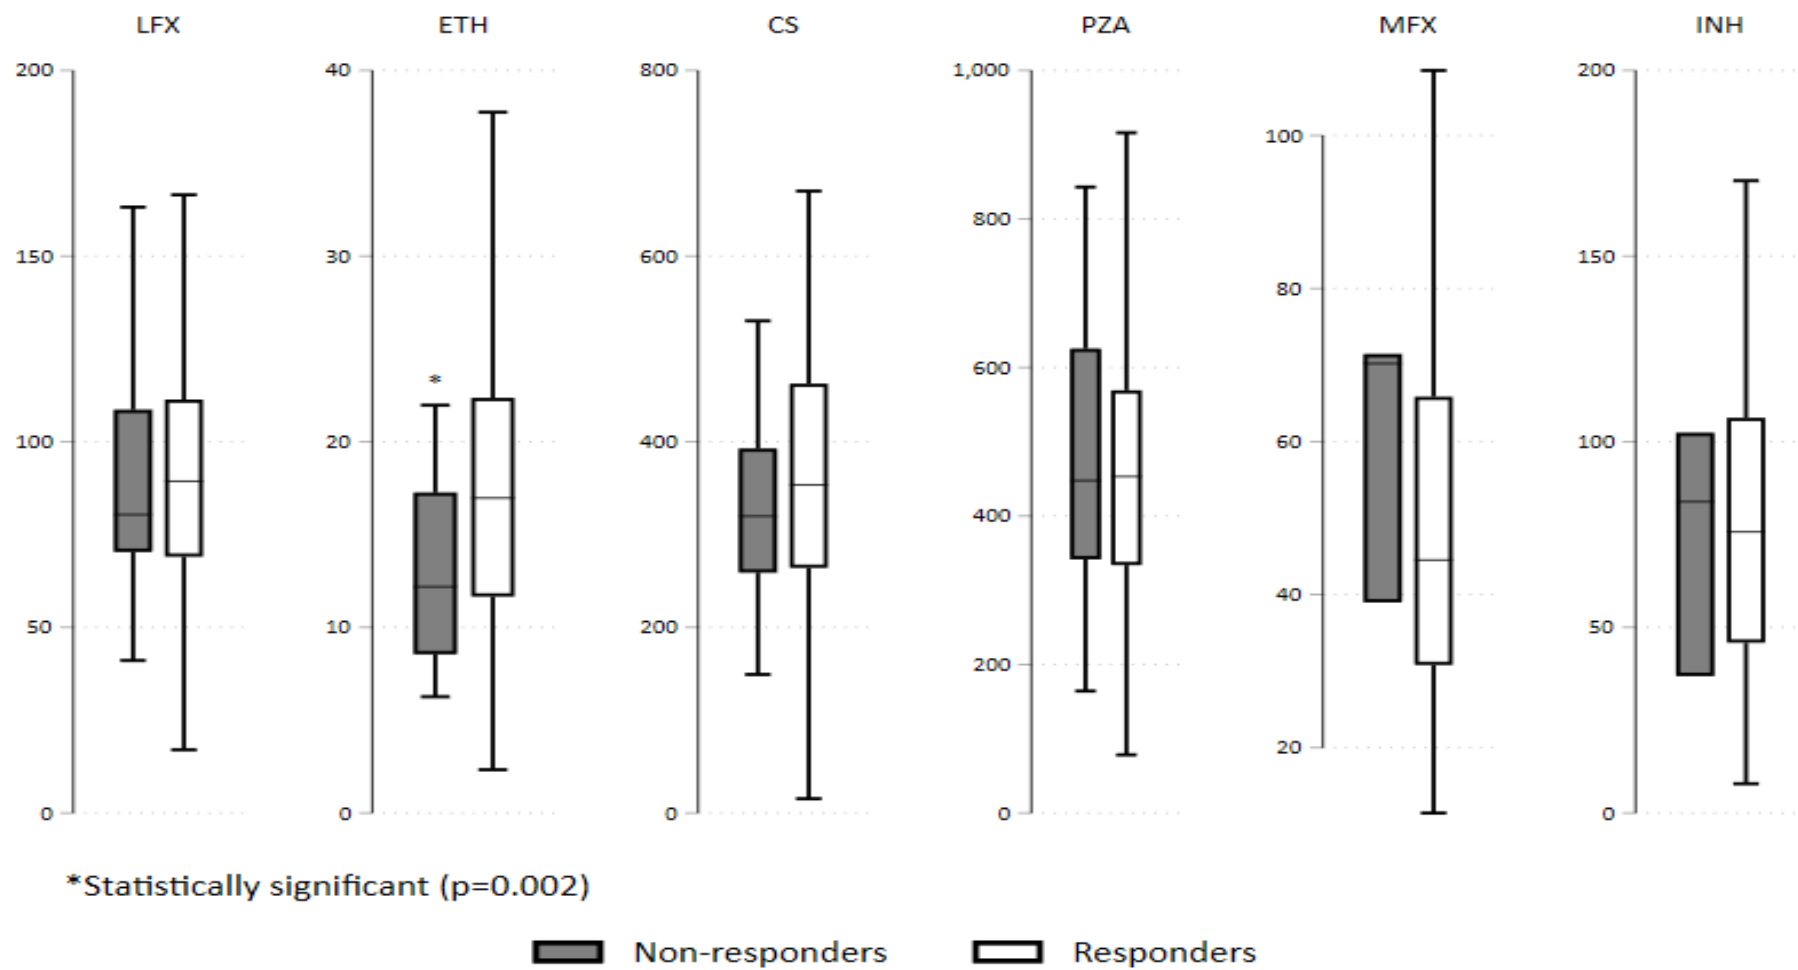

Source: https://www.medrxiv.org/content/10.1101/2020.05.26.20111534v1.full.pdf
